# Supplementary material for: Effect of Ethanol Consumption on the Placenta and Liver of Partially IGF-1-Deficient Mice: The Role of Metabolism via CYP2E1 and the Antioxidant Enzyme System
Source: MDPI journal article supplement (doi:10.3390/biology11091264), 2022-08-25

## Supplementary material

**Supplementary Table S1.** Maternal parameters (maternal weight, average of food and beverage consumption) during the 14-days acclimation period to ethanol.

| Experimental group            | Weight gain (g) | Average food consumption (g) | Average beverage consumption (mL) |
|-------------------------------|-----------------|------------------------------|-----------------------------------|
| WT-Control<br>( <i>n</i> = 6) | -0.47 ± 0.39    | 4.61 ± 0.47                  | 9.23 ± 0.96                       |
| WT-Ethanol<br>( <i>n</i> = 4) | -0.83 ± 1.24    | 5.46 ± 1.90                  | 12.95 ± 0.99                      |
| HZ-Control<br>( <i>n</i> = 6) | -0.85 ± 0.40    | 4.36 ± 0.80                  | 9.49 ± 1.05                       |
| HZ-Ethanol<br>( <i>n</i> = 9) | -0.94 ± 0.30    | 3.77 ± 0.34                  | 12.09 ± 0.64                      |

The statistical tests applied were Kruskal-Wallis test or ANOVA to compare between all experimental groups. Differences were considered significant at a level of  $p < 0.05$ : no significant differences were found.

**Supplementary Table S2.** Maternal body weight at gestational day 1.

| Experimental group         | Maternal body weight (g)    |
|----------------------------|-----------------------------|
| WT-Control ( <i>n</i> = 6) | 28.10 ± 1.06                |
| WT-Ethanol ( <i>n</i> = 4) | 29.58 ± 1.55                |
| HZ-Control ( <i>n</i> = 6) | 23.95 ± 0.75 <sup>a,b</sup> |
| HZ-Ethanol ( <i>n</i> = 9) | 25.39 ± 0.48 <sup>c</sup>   |

The statistical test applied was ANOVA to compare between all experimental groups. Differences were considered significant at a level of  $p < 0.05$ . The letters showed the significant differences founded: <sup>a</sup> $p < 0.05$  HZ-Control vs WT-Control; <sup>b</sup> $p < 0.01$  HZ-Control vs WT-Ethanol; <sup>c</sup> $p < 0.05$  HZ-Ethanol vs WT-Ethanol.

**Supplementary Table S3.** Densitometry readings obtained from each band in immunoblotting analysis for CYP2E1 and  $\beta$ -actin proteins in liver from pregnant dams.

| Well in gel | Treatment           | Mouse    | Density CYP2E1 | Density Actin | Actine normalized | Normalized experimental signal |
|-------------|---------------------|----------|----------------|---------------|-------------------|--------------------------------|
| 1           | WT+H <sub>2</sub> O | 4544 HÍG | 20664.075      | 15977.832     | 0.50              | 41474.13                       |
| 2           | WT+EtOH             | 4483 HÍG | 29872.832      | 14994.933     | 0.47              | 63886.79                       |
| 3           | HZ+H <sub>2</sub> O | 4447 HÍG | 27043.125      | 18620.66      | 0.58              | 46573.73                       |
| 4           | HZ+EtOH             | 4428 HÍG | 23872.468      | 11492.296     | 0.36              | 66614.64                       |
| 5           | WT+H <sub>2</sub> O | 4422 HÍG | 18486.125      | 18144.296     | 0.57              | 32672.69                       |
| 6           | WT+EtOH             | 4418 HÍG | 28168.004      | 32068.539     | 1.00              | 28168.00                       |
| 7           | HZ+H <sub>2</sub> O | 4446 HÍG | 26660.489      | 25129.66      | 0.78              | 34022.07                       |
| 8           | HZ+EtOH             | 4403 HÍG | 19801.024      | 24328.418     | 0.76              | 26100.75                       |
| 1           | WT+H <sub>2</sub> O | 4502 HÍG | 17562.803      | 28955.024     | 0.88              | 19911.77                       |
| 2           | WT+H <sub>2</sub> O | 4402 HÍG | 13610.953      | 31231.539     | 0.95              | 14306.56                       |
| 3           | HZ+H <sub>2</sub> O | 4416 HÍG | 16934.903      | 32827.66      | 1.00              | 16934.90                       |
| 4           | HZ+H <sub>2</sub> O | 4430 HÍG | 26686.56       | 28990.832     | 0.88              | 30218.43                       |
| 5           | HZ+EtOH             | 4424 HÍG | 25438.832      | 25181.296     | 0.77              | 33163.40                       |
| 6           | HZ+EtOH             | 4437 HÍG | 9329.125       | 23920.66      | 0.73              | 12802.88                       |
| 1           | HZ+H <sub>2</sub> O | 4501 HÍG | 30661.631      | 28245.317     | 0.56              | 54761.39                       |
| 2           | HZ+EtOH             | 4476 HÍG | 29323.61       | 28850.024     | 0.57              | 51273.97                       |
| 3           | HZ+EtOH             | 4477 HÍG | 31481.803      | 19405.681     | 0.38              | 81838.26                       |
| 4           | HZ+EtOH             | 4460 HÍG | 22518.974      | 50445.877     | 1.00              | 22518.97                       |
| 5           | HZ+EtOH             | 4464 HÍG | 27592.288      | 50445.877     | 1.00              | 27592.29                       |

**Supplementary Figure S1.** Immunoblot images for CYP2E1 and  $\beta$ -actin proteins in liver from pregnant dams.

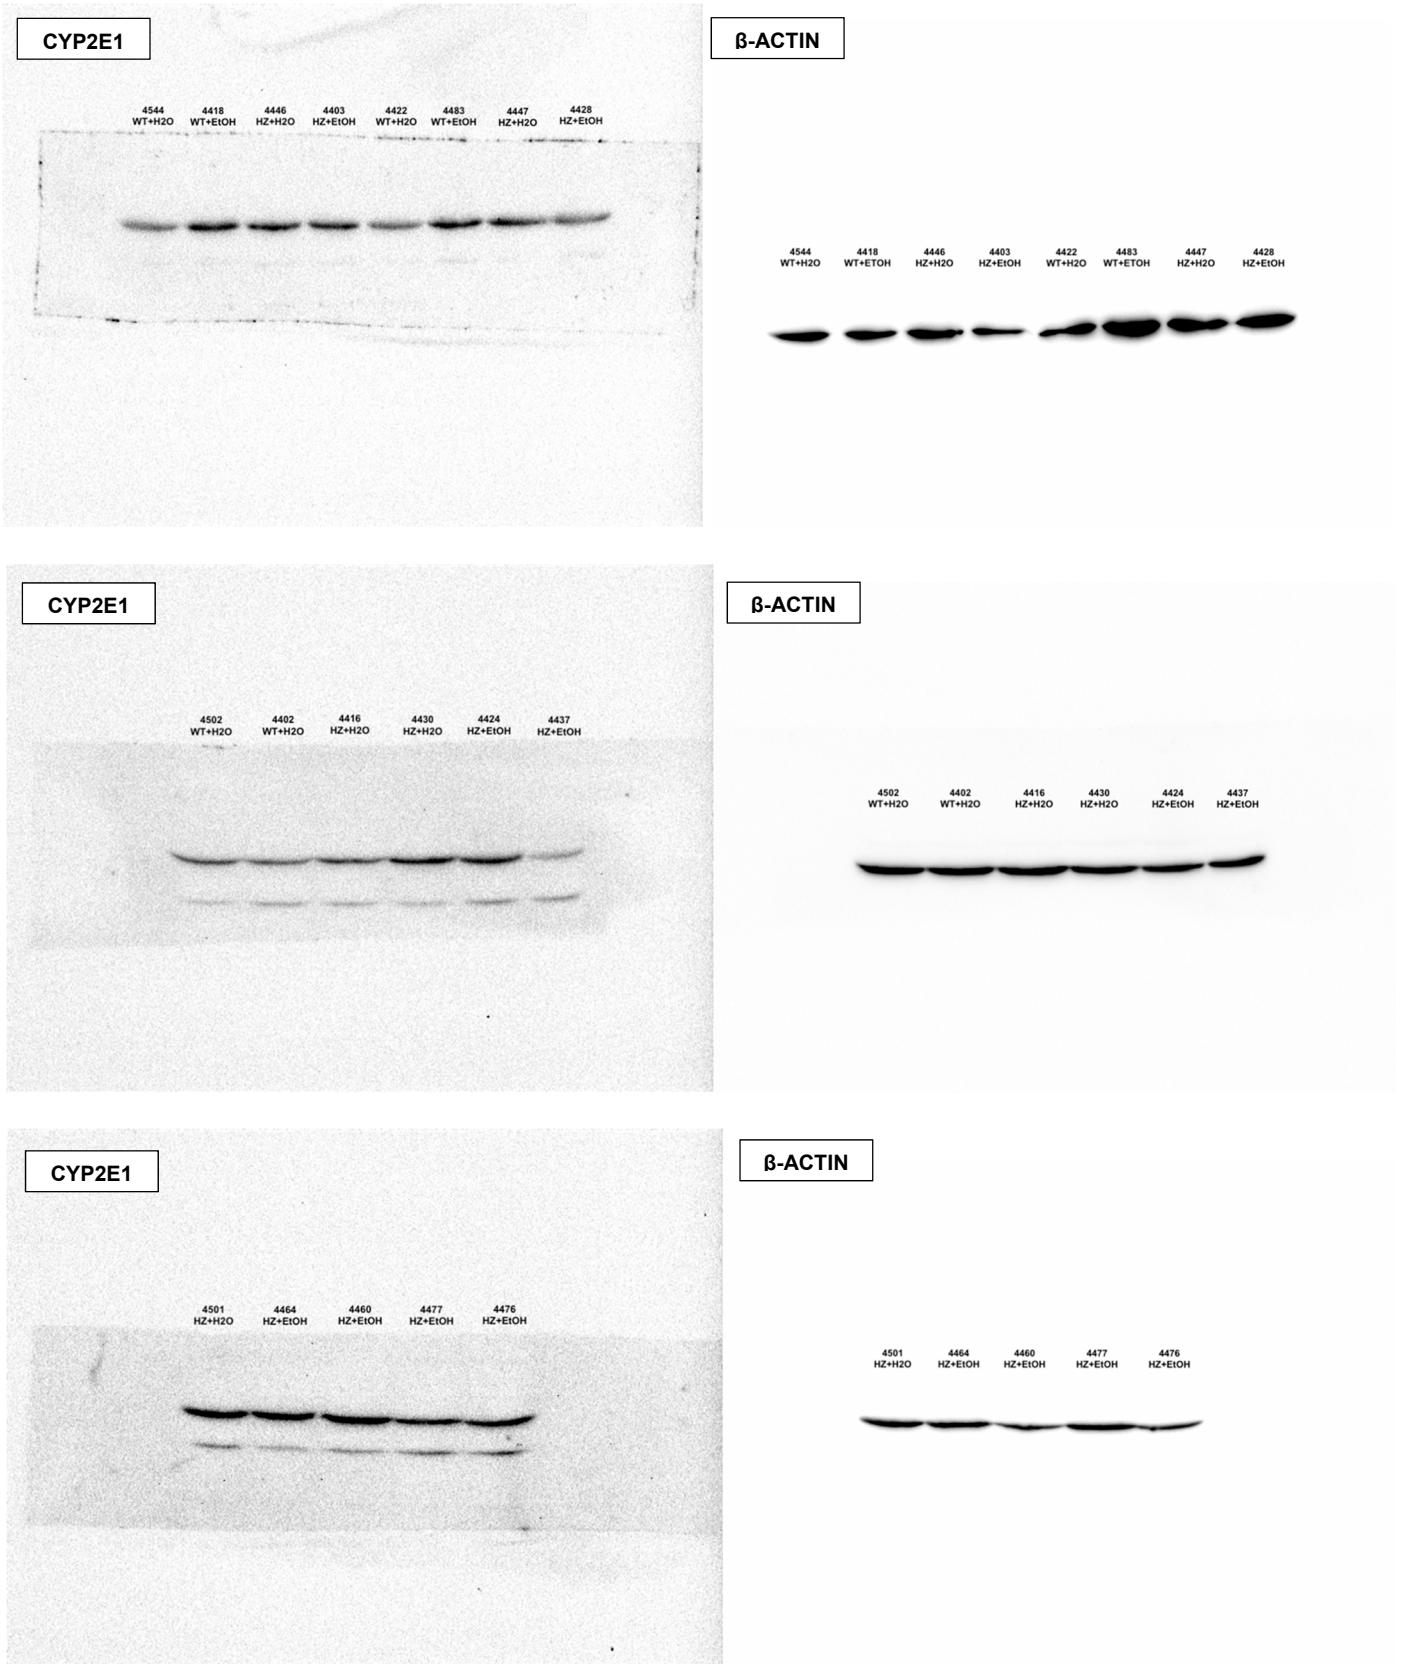

**Supplementary Table S4.** Densitometry readings obtained from each band in immunoblotting analysis for 4-HNE and  $\beta$ -actin proteins in liver from pregnant dams.

| Well in gel | Treatment           | Mouse    | Density 4-HNE | Density Actin | Actine normalized | Normalized experimental signal |
|-------------|---------------------|----------|---------------|---------------|-------------------|--------------------------------|
| 1           | WT+H <sub>2</sub> O | 4544 HÍG | 8229.811      | 10104.276     | 0.35              | 23191.38                       |
| 2           | WT+EtOH             | 4483 HÍG | 20078.439     | 12693.154     | 0.45              | 45040.41                       |
| 3           | HZ+H <sub>2</sub> O | 4447 HÍG | 17634.347     | 15327.447     | 0.54              | 32759.06                       |
| 4           | HZ+EtOH             | 4428 HÍG | 15816.782     | 13193.497     | 0.46              | 34135.02                       |
| 5           | WT+H <sub>2</sub> O | 4422 HÍG | 19766.468     | 15694.205     | 0.55              | 35861.76                       |
| 6           | WT+EtOH             | 4418 HÍG | 29704.61      | 27707.861     | 0.97              | 30525.50                       |
| 7           | HZ+H <sub>2</sub> O | 4446 HÍG | 20111.711     | 22428.74      | 0.79              | 25532.07                       |
| 8           | HZ+EtOH             | 4403 HÍG | 10899.054     | 28473.569     | 1.00              | 10899.05                       |
| 1           | WT+H <sub>2</sub> O | 4502 HÍG | 8664.882      | 15695.225     | 0.65              | 13342.00                       |
| 2           | WT+H <sub>2</sub> O | 4402 HÍG | 23899.317     | 24167.175     | 1.00              | 23899.32                       |
| 3           | HZ+H <sub>2</sub> O | 4416 HÍG | 19244.489     | 23454.468     | 0.97              | 19829.27                       |
| 4           | HZ+H <sub>2</sub> O | 4430 HÍG | 5870.953      | 11769.225     | 0.49              | 12055.54                       |
| 5           | HZ+EtOH             | 4424 HÍG | 4151.711      | 6900.861      | 0.29              | 14539.51                       |
| 6           | HZ+EtOH             | 4437 HÍG | 7305.004      | 14868.518     | 0.62              | 11873.50                       |
| 1           | HZ+H <sub>2</sub> O | 4501 HÍG | 22177.388     | 19536.024     | 0.77              | 28801.86                       |
| 2           | HZ+EtOH             | 4476 HÍG | 9158.731      | 11826.146     | 0.47              | 19648.91                       |
| 3           | HZ+EtOH             | 4477 HÍG | 19366.095     | 13305.439     | 0.52              | 36928.29                       |
| 4           | HZ+EtOH             | 4460 HÍG | 26484.803     | 25371.51      | 1.00              | 26484.80                       |
| 5           | HZ+EtOH             | 4464 HÍG | 15308.024     | 11942.439     | 0.47              | 32521.64                       |

**Supplementary Figure S2.** Immunoblot images for 4-HNE and  $\beta$ -actin proteins in liver from pregnant dams.

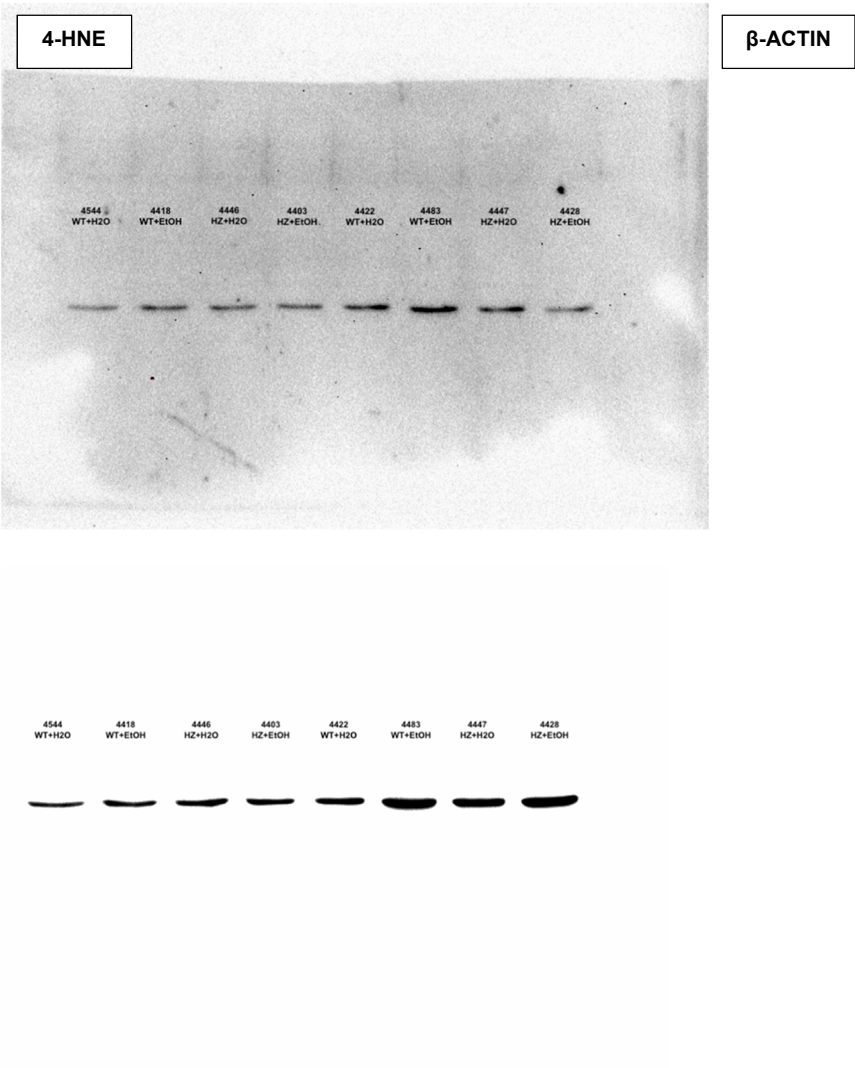

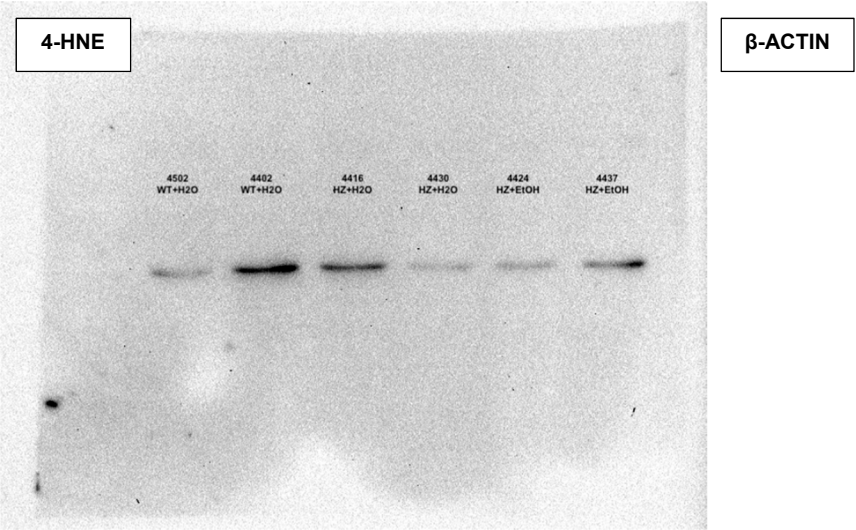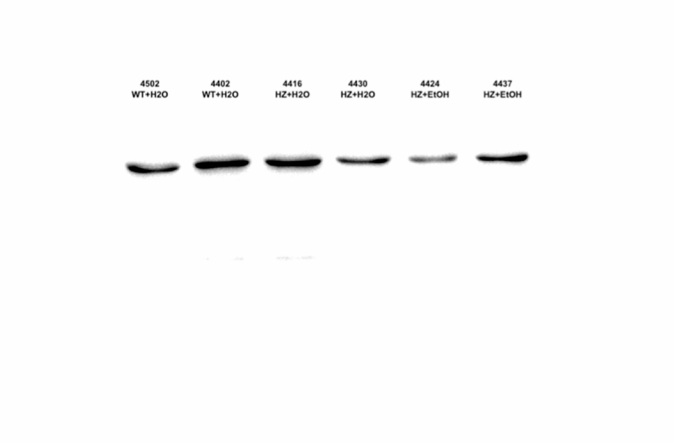

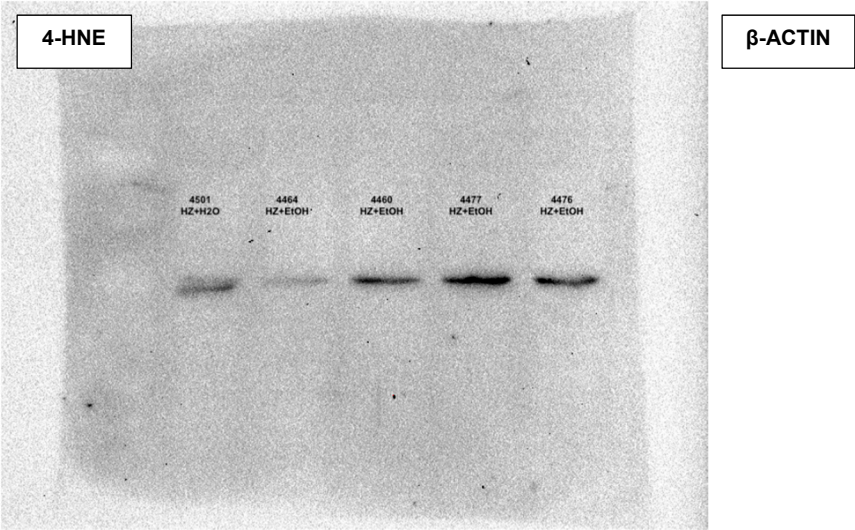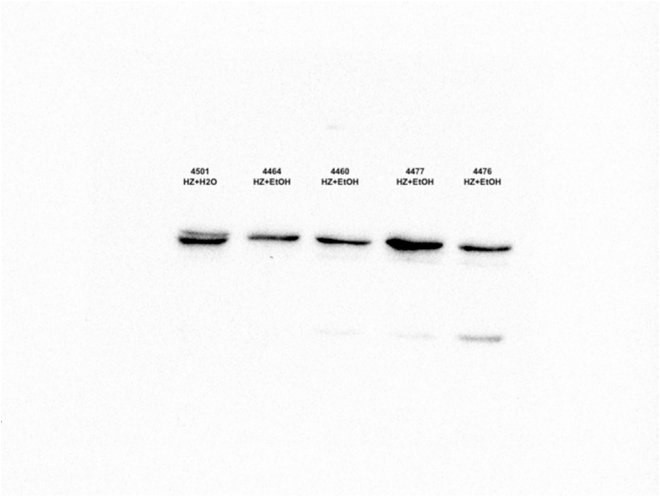

Supplement: s1 [file s1]
